# Supplementary material
Source: PubMed Central journal article supplement (PMC2903204)
Supplement: NIHMS215553-supplement-1_si_001.pdf [file NIHMS215553-supplement-1_si_001.pdf]

## Supporting Material

### Mechanistic Insights of Xenon Inhibition of NMDA Receptors from MD Simulations

Lu Tian Liu,<sup>†</sup> Yan Xu,<sup>†‡§</sup> and Pei Tang<sup>†‡¶\*</sup>

Department of <sup>†</sup>Anesthesiology, <sup>‡</sup>Pharmacology, <sup>§</sup>Structural Biology, and <sup>¶</sup>Computational Biology, University of Pittsburgh School of Medicine, Pittsburgh, Pennsylvania 15260

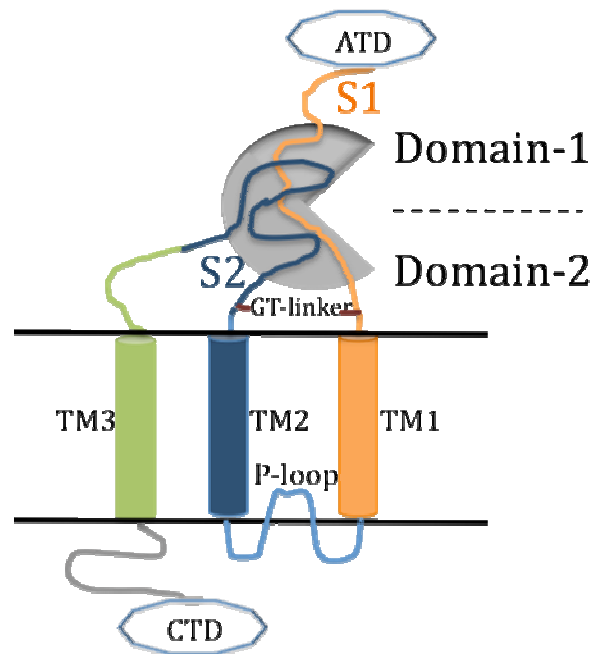

**Figure S1.** A cartoon picture showing the components for one subunit of NMDA receptor. The ligand-binding domain (LBD; highlighted in *grey half spheres*) is composed of two segments: S1 and S2 that forms two domains referred to as Domain-1 and Domain-2. The black lines highlight the boundary of lipid bilayer, within which three transmembrane domains are embedded (*TM1*, *TM2* and *TM3*). S1 is connected with ATD and TM1 and S2 is linked to TM 2 and TM3. The determined X-ray structure for the LBD has an artificial GT linker connecting S2 directly to S1, and is disconnected with ADT and TM3.

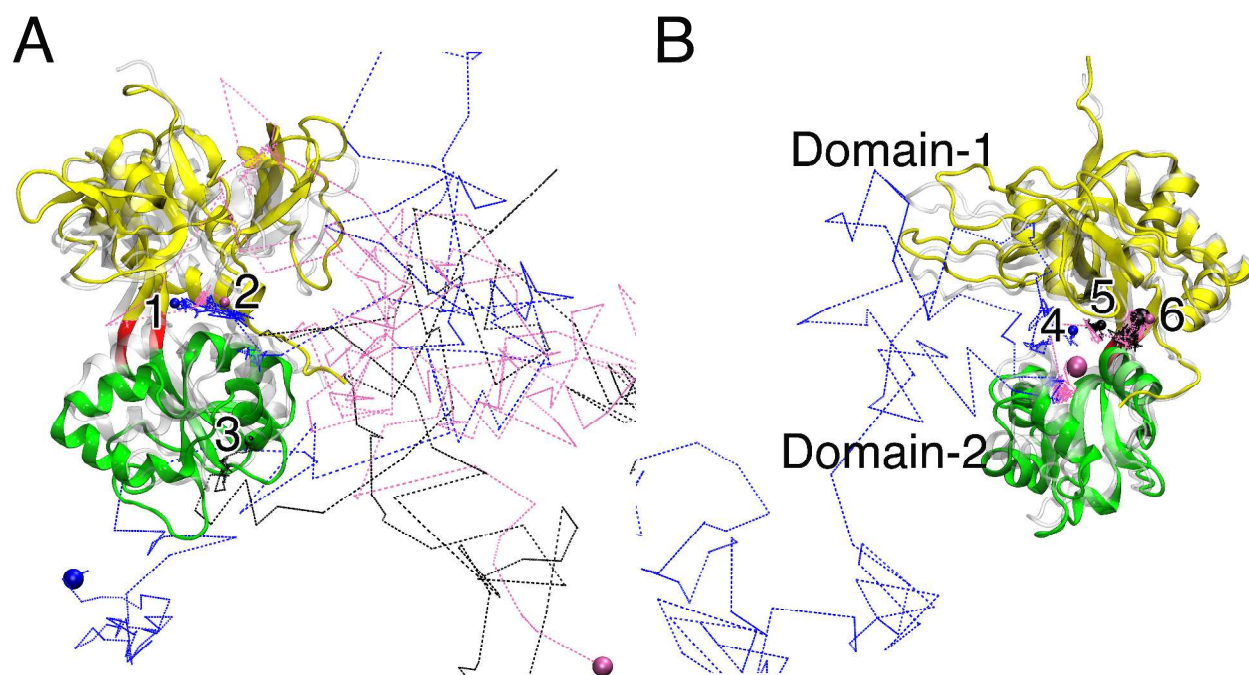

**Figure S2.** Xenon trajectories in the open-cleft ligand-binding domain (LBD) of NR1A (A) and NR1B (B) over the course of 20-ns simulations. The initial protein structure (PDB: 1PBQ) (*transparent and white*) is overlapped with the ending structure after 20-ns simulation (*Domain-1* in yellow, *Domain-2* in green, and the hinge region in red). Small and large spheres represent the initial and final locations of xenon, respectively. The xenon trajectories are shown in dash lines with a time step of 10ps. Four out of six xenon atoms originally in the open-cleft LBD migrated into water. Xe-5<sub>open</sub> (*pink*) and Xe-6<sub>open</sub> (*black*) in NR1B were relatively stable and moved only within the cleft between Domain-1 and Domain-2.

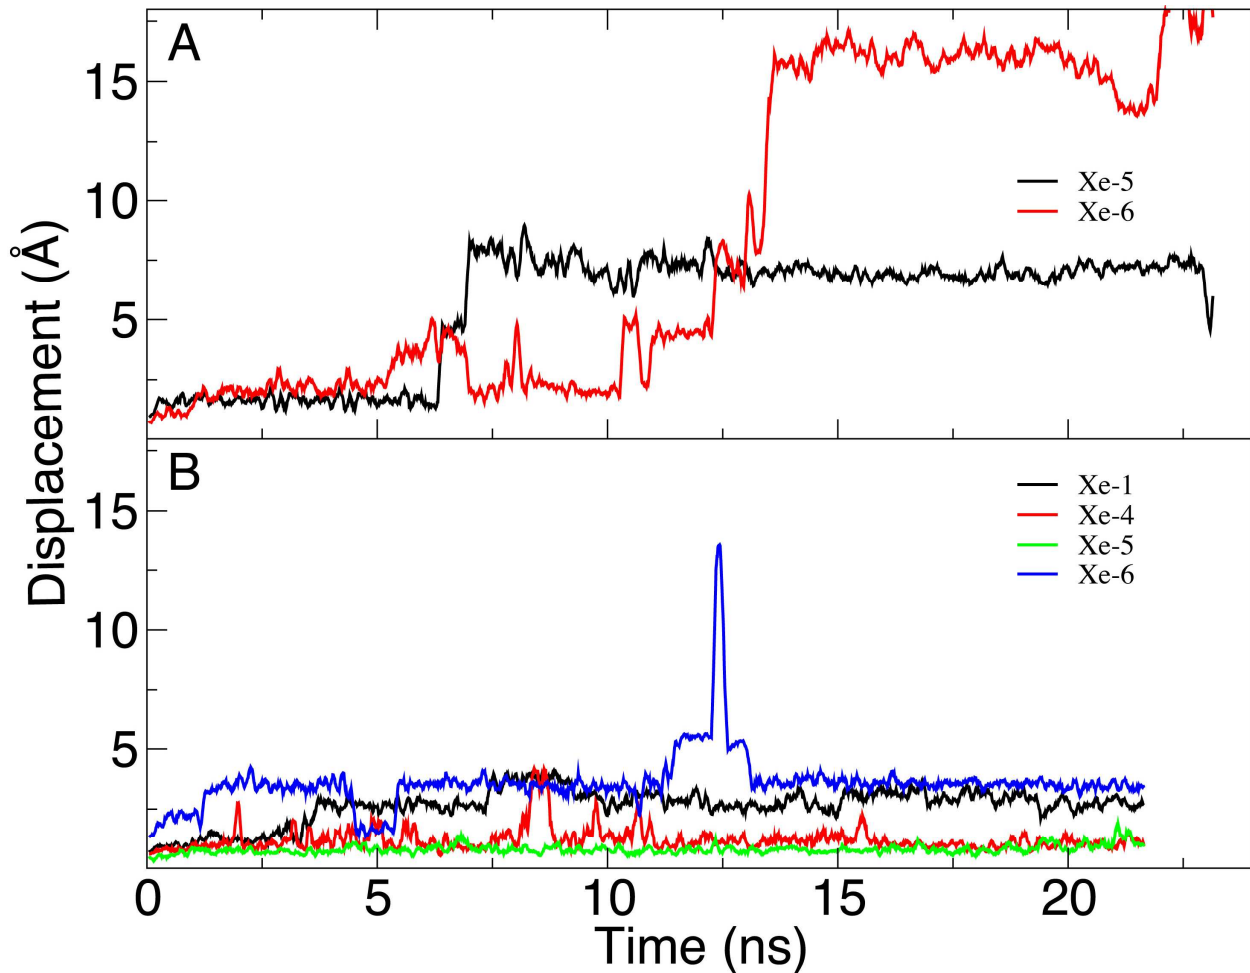

**Figure S3.** The displacement of relative stable xenon atoms in LBD with respect to their initial locations in the open-cleft (*A*) or closed-cleft (*B*) conformations during the 20-ns simulations. The labels are the same as those in Figure S2 and Figure 2 in the text. Overall, xenon atoms in the closed-cleft LBD had much smaller displacement than those xenon atoms in the open-cleft LBD.

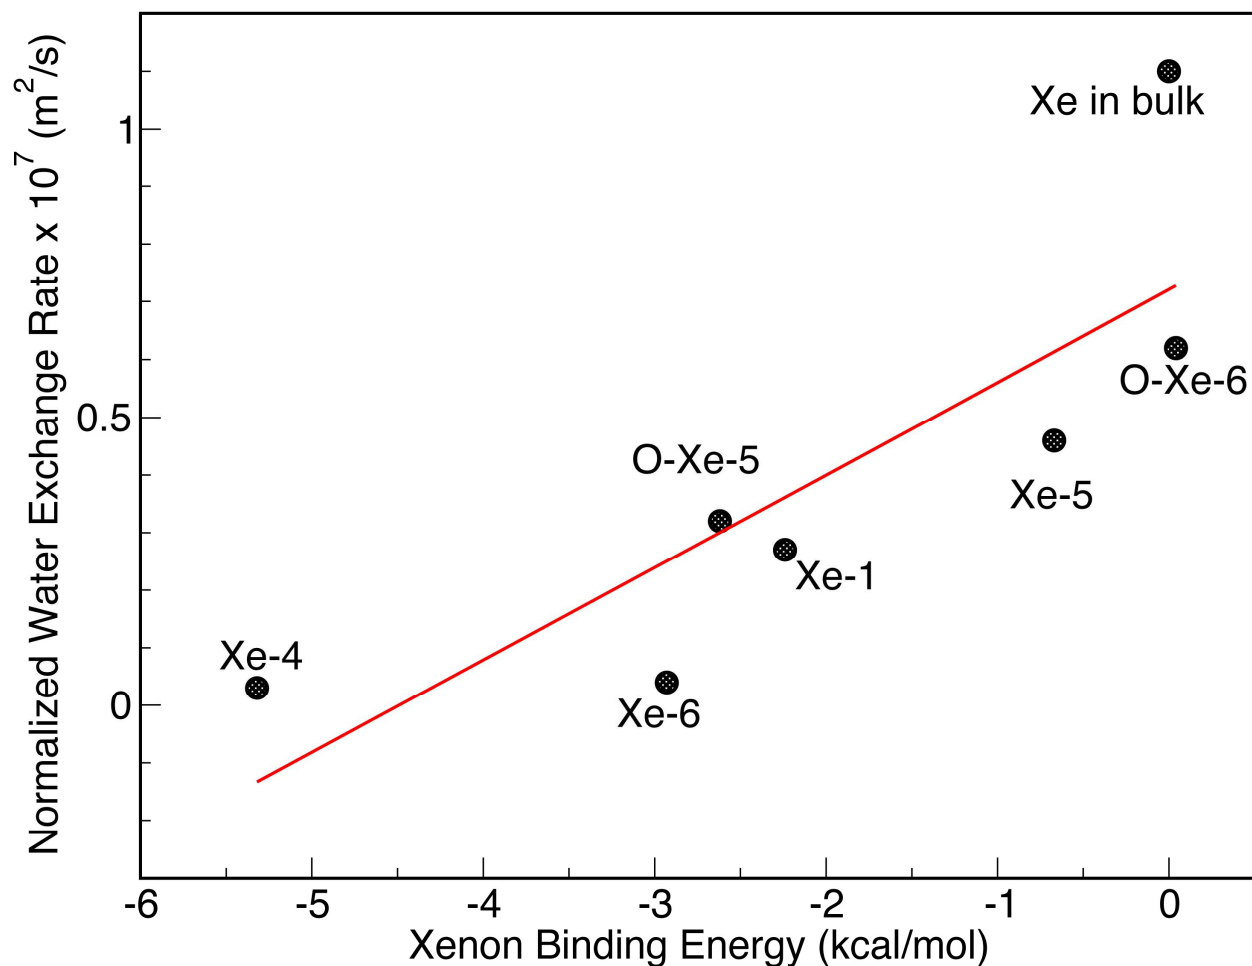

**Figure S4.** The association between the normalized water exchange rate around each stable xenon sites and the binding energy of individual xenon. The red line resulted from the linear regression of data. O-Xe-5 and O-Xe-6 are the two xenon atoms in the open-cleft LBD. The calculated xenon free energy in the bulk water ( $1.45 \text{ kcal/mol}$ ) agrees very well with the experimentally reported xenon solvation energy ( $5.6 \text{ kJ/mol}$ ) [Ben-Naim, A. *Solvation thermodynamics*. Plenum Press: New York, 1987].

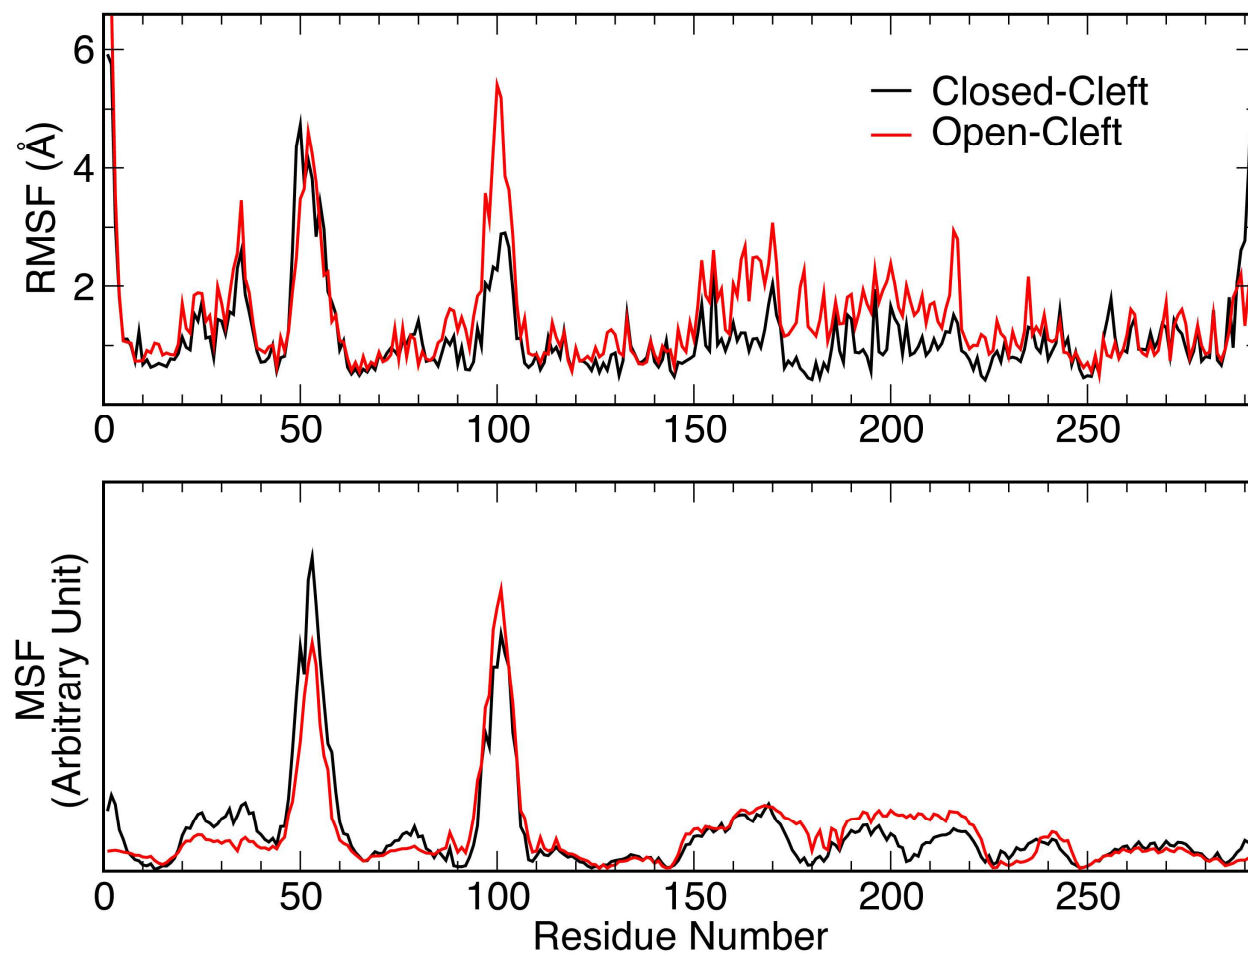

**Figure S5.** Top panel: the RMSFs of NR1 in the open- (*red*) and closed-cleft (*black*) conformations were obtained from the last 5 ns simulations for the control systems. Bottom panel: the MSF of C $\alpha$  atoms of NR1 in the open- (*red*) and closed-cleft (*black*) conformations in the control systems, obtained from the three slowest frequency modes of GNM analysis.

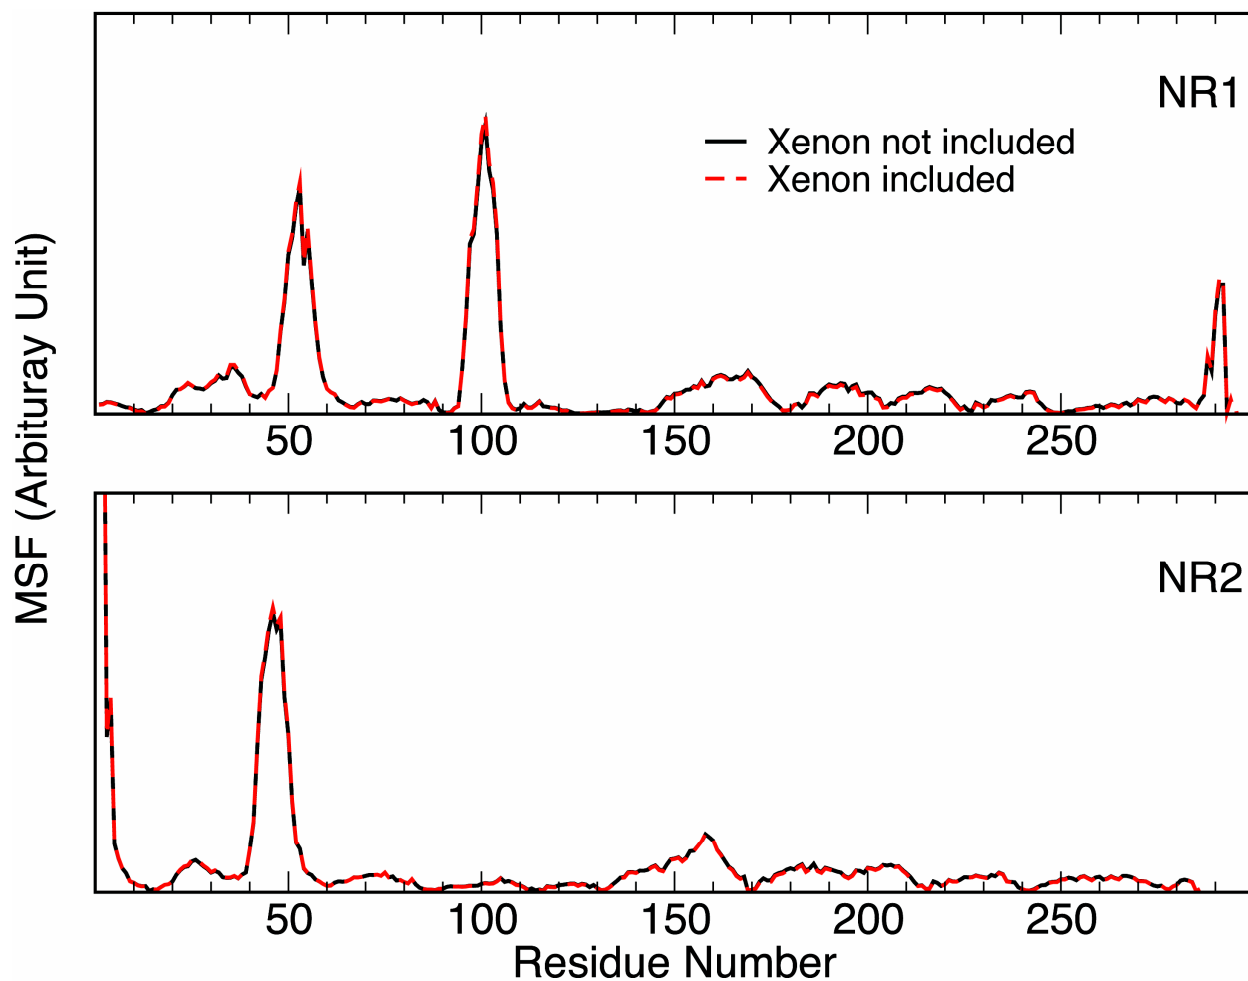

**Figure S6.** MSF of C $\alpha$  atoms of NR1 (top panel) and NR2 (bottom panel) in closed-cleft conformation in the xenon system, obtained from the three slowest frequency modes of GNM analysis. GNM analysis showed almost identical results for calculations performed with (*red*) and without (*black*) xenon atoms included in building the contact matrix.

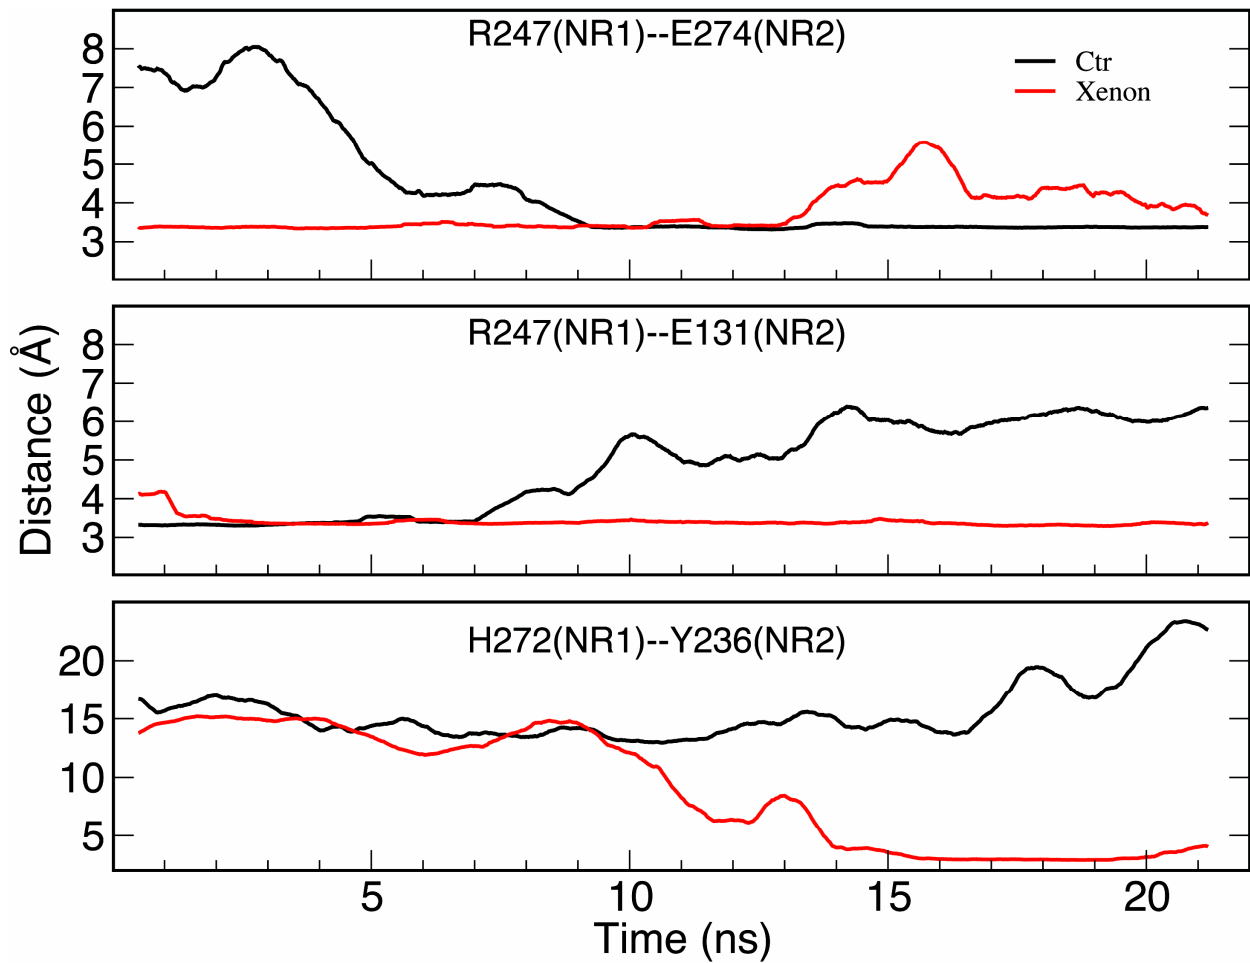

**Figure S7.** The distances between the pairs of residues located at the interface of NR1 and NR2 subunit during the 20-ns simulation. Changes in these distances correspond to changes in the electrostatic interaction pattern, which might account for the reduced GT-linker distance in the presence of xenon, as shown in Figure 6 in the main text.
